# Supplementary material
Source: Elsevier journal article supplement (https://www.sciencedirect.com/science/article/pii/S2445147921000515)
Supplement: mmc1 [file S2445147921000515:mmc1.pdf]

# Estudio Prevalencia Heridas Crónicas

## Gerencia de Atención Integrada Cuenca

### 2020

El presente estudio tiene por objetivo conocer cuál es la prevalencia de las lesiones crónicas (pie diabético, úlcera arterial, úlcera venosa, úlcera por presión, úlcera traumática y laceración cutánea, y lesión quirúrgica cronicada) en la Gerencia de Atención Integrada de Cuenca (GAI) en el año 2020.

El cuestionario está dirigido a aquellos profesionales de la salud (habitualmente enfermeras/os, ya que son las encargadas del tratamiento directo de las heridas crónicas) que trabajen en centros sanitarios adscritos a la GAI de Cuenca.

Se mantendrá siempre la confidencialidad sobre las personas que participen en el estudio y sobre los datos proporcionados, que se utilizarán siempre de forma agregada y en ningún caso a nivel individual.

Si tiene alguna duda sobre este estudio puede contactar con los investigadores: Ángel Herraiz Adillo ([ahadillo@hotmail.com](mailto:ahadillo@hotmail.com)), María Ángeles Molina Morate ([mamolina@sescam.jccm.es](mailto:mamolina@sescam.jccm.es)), Beatriz Cervera Monteagudo ([bcervera@sescam.jccm.es](mailto:bcervera@sescam.jccm.es)), María Victoria Cruz López ([mavicruzlo@gmail.com](mailto:mavicruzlo@gmail.com)), Javier Romero ([jjromero@sescam.jccm.es](mailto:jjromero@sescam.jccm.es))

Gracias por su colaboración.

\* Required

1. Email address \*

---

### Instrucciones

Se recomienda TENER ACCESO A LA HISTORIA DEL PACIENTE en el momento de realizar la encuesta para obtener algunos datos necesarios (edad, tratamiento de la lesión, etc.)

En cualquier caso, siempre podrá salir de esta plataforma (sin finalizar la encuesta) y volver a acceder a ella para completarla, únicamente con la obligatoriedad de que lo haga desde el mismo ordenador.

#### IMPORTANTE:

Ya que se trata de un estudio de PREVALENCIA PUNTUAL, el profesional deberá responder en relación al número de casos (pacientes con lesiones crónicas) que existen en su cupo el día 17 de Febrero de 2020 (independientemente de que ese día dichos pacientes acudan a la consulta o no). A pesar de esto, la encuesta podrá contestarse durante tres semanas.

Definiremos LESIÓN CRÓNICA como aquella "con una duración previsible igual o mayor de 3 semanas o considerada compleja, difícil de cicatrizar o crónica".

Para EVITAR DUPLICIDADES, cada profesional enfermero debe contestar exclusivamente sobre aquellos PACIENTES ADSCRITOS A SU CUPO. Los profesionales PEAC, no deben contestar la encuesta.

Se deberán RELLENAR TANTAS ENCUESTAS COMO PACIENTES con lesiones crónicas existan.

## Profesional Sanitario. Centro de trabajo

2. \*

*Mark only one oval.*

- ☐ Centro de Salud. Rural
- ☐ Centro de Salud. Urbano
- ☐ Hospital. Área Médica
- ☐ Hospital. Área Quirúrgica
- ☐ Hospital. UCI
- ☐ Hospital de día
- ☐ Residencia Sociosanitaria

## Existencia de pacientes con lesiones crónicas

3. ¿Tiene algún paciente con lesiones crónicas en su cupo en la fecha a la que se refiere el estudio?

*Mark only one oval.*

- ☐ Sí
- ☐ No      *Skip to section 10 (Ha llegado al final, pulse enviar)*

## Paciente

4. Identificación del paciente \*

Asigne una clave alfa numérica al paciente con las dos primeras consonantes de cada apellido, dos últimas cifras del año de nacimiento, mes y día. Por ejemplo: Pedro García Mas, nacido el 1 de Febrero de 1953 sería GRMS530201. (En el caso de apellidos compuestos, considere sólo la "parte principal" del apellido. Por ejemplo: Pedro de la Torre Gómez sería TRGM).

---

5. Edad del paciente \*

---

## 6. Género \*

*Mark only one oval.*

☐ Hombre

☐ Mujer

## 7. ¿Diabetes? \*

*Mark only one oval.*

☐ Sí

☐ No

☐ No sabe

## 8. Tipo de diabetes

*Mark only one oval.*

☐ Tipo I

☐ Tipo II

☐ Otra

☐ No sabe

## 9. Años evolución de la diabetes

---

## 10. ¿Hipertenso? \*

*Mark only one oval.*

☐ Sí

☐ No

☐ No sabe

## 11. Incontinencia urinaria \*

*Mark only one oval.*

- ☐ Habitual (al menos 1 episodio por día)
- ☐ Ocasional (menos de 1 episodio por día)
- ☐ Lleva sonda vesical o colector
- ☐ Lleva pañal
- ☐ No
- ☐ No sabe

## 12. Incontinencia fecal \*

*Mark only one oval.*

- ☐ Habitual (al menos 1 episodio por semana)
- ☐ Ocasional (menos de 1 episodio por semana)
- ☐ Lleva sonda rectal
- ☐ Lleva pañal
- ☐ No
- ☐ No sabe

## 13. ¿Encamado/inmovilizado? \*

*Mark only one oval.*

- ☐ Encamado
- ☐ Cama/sillón
- ☐ Silla de ruedas
- ☐ Muletas/andador
- ☐ Movilidad normal

14. Si encamado/inmovilizado, ¿usa escala de valoración del riesgo de úlcera por presión?

*Mark only one oval.*

- ☐ Sí, Norton
- ☐ Sí, Norton modificada
- ☐ Sí, Braden
- ☐ Sí, EMINA
- ☐ Sí, otras escalas
- ☐ No
- ☐ No sabe

15. Si encamado/inmovilizado, ¿usa una Superficie Especial de Manejo de la Presión?

*Mark only one oval.*

- ☐ Sí, dinámica (por ejemplo, colchón de aire alternante)
- ☐ Sí, estática (por ejemplo, cojín de silicona)
- ☐ Ambas
- ☐ No
- ☐ No sabe

16. Si encamado/inmovilizado, ¿qué estrategia usa para el alivio de la presión?

Puede seleccionar varias respuestas.

*Check all that apply.*

- ☐ Cambios posturales
- ☐ Taloneras de textil
- ☐ Apósitos de espuma/foam/hidrocoloide
- ☐ Ácidos grasos hiperoxigenados
- ☐ No
- ☐ No sabe

17. Si lesión en el miembro inferior, ¿se realizó índice tobillo brazo?

*Mark only one oval.*

- ☐ Sí
- ☐ No
- ☐ No sabe

18. Si sospecha de pie diabético neuropático, ¿usa terapia de descarga?

*Mark only one oval.*

- ☐ Zapato terapéutico
- ☐ Zapato de calle adaptado
- ☐ Bota de contacto total no removible
- ☐ Bota de contacto total removible
- ☐ Almohadillado con foam o espumas
- ☐ No
- ☐ No sabe

19. Si sospecha de etiología venosa, ¿usa terapia específica de compresión?

*Mark only one oval.*

- ☐ Vendaje multicapa
- ☐ Media de compresión fuerte
- ☐ Almohadillado con algodón más crepé
- ☐ Calcetín elástico
- ☐ Bota Unna
- ☐ No
- ☐ No sabe

Lesión 1

Los datos de la siguiente sección deben referirse exclusivamente a la "Lesión 1"

## 20. Lesión. TIPO: \*

*Mark only one oval.*

- ☐ Pie diabético
- ☐ Úlcera arterial (las lesiones de etiología supuestamente isquémica, localizadas en el pie de pacientes diabéticos considérelas como "pie diabético")
- ☐ Úlcera venosa
- ☐ Úlcera por presión
- ☐ Úlcera traumática (incluye la laceración cutánea o skin tear)
- ☐ Lesión quirúrgica cronificada (dehiscencia de sutura con cicatrización por 2ª intención)
- ☐ Otras

## 21. Si contestó PIE DIABÉTICO, ¿qué CAUSA cree que es la que predomina?

*Mark only one oval.*

- ☐ Neuropatía
- ☐ Vasculopatía
- ☐ Infección
- ☐ Mixta
- ☐ No sabe

## 22. LOCALIZACIÓN de la lesión \*

*Mark only one oval.*

- ☐ Sacro/coxis
- ☐ Trocánter
- ☐ Isquion
- ☐ Glúteo
- ☐ Pierna (excepto pie)
- ☐ Pie
- ☐ Espalda
- ☐ Tórax
- ☐ Abdomen
- ☐ Brazos (excepto mano)
- ☐ Manos
- ☐ Cabeza
- ☐ Cuello
- ☐ Zona genital/perineal
- ☐ Otras

## 23. PROFUNDIDAD de la lesión (aplicable solamente a úlceras por presión)

Conteste solamente si contestó "Úlcera por presión" en la pregunta "TIPO de lesión".

*Mark only one oval.*

- ☐ Categoría I. Eritema no blanqueante
- ☐ Categoría II. Espesor parcial
- ☐ Categoría III. Pérdida total del espesor de la piel
- ☐ Categoría IV. Hueso, tendón o músculo expuestos
- ☐ No estadiable (por ejemplo, escara seca en talón)
- ☐ No sabe



24. PROFUNDIDAD de la lesión según escala Wagner (aplicable solamente a pie diabético)

Conteste solamente si contestó "Pie diabético" en la pregunta "TIPO de lesión".

*Mark only one oval.*

- ☐ Grado I. Úlcera superficial que afecta todo el espesor de la piel pero no afecta planos profundos
- ☐ Grado II. Úlcera profunda, afecta ligamentos o músculo, pero no al hueso ni hay abscesos
- ☐ Grado III. Úlcera profunda, con celulitis o absceso, a menudo con osteomielitis
- ☐ Grado IV. Gangrena localizada
- ☐ Grado V. Gangrena extensa que involucra la mayor parte del pie
- ☐ No sabe

25. PROFUNDIDAD de la lesión según escala CONUEI 2018 (aplicable al resto de lesiones)

Conteste en relación a aquella lesión que no sea úlcera por presión o pie diabético.

*Mark only one oval.*

- ☐ Grado I: úlcera que afecta a la epidermis y dermis
- ☐ Grado II: úlcera que afecta al tejido celular subcutáneo o hipodermis
- ☐ Grado III: úlcera que afecta a la fascia y al músculo
- ☐ Grado IV: úlcera que afecta al hueso
- ☐ No sabe

26. Área de la lesión. LARGO (cm) \*

Especificar con un decimal. Por ejemplo: 2,3

---

27. Área de la lesión. ANCHO (cm) \*

Especificar con un decimal. Por ejemplo: 2,1

---

28. ¿Úlcera RECURRENTE? \*

*Mark only one oval.*

- ☐ Sí
- ☐ No
- ☐ No sabe

29. ¿Se considera ahora INFECTADA? \*

*Mark only one oval.*

- ☐ Sí, signos clásicos: dolor, calor, rubor, secreción purulenta
- ☐ Sí, signos atípicos: tejido friable, decoloración, hipergranulación, biofilm, aumento del exudado
- ☐ No
- ☐ No sabe

30. TIEMPO de evolución (días) \*

---

31. Si sospecha infección, TRATAMIENTO actual de dicha infección:

Puede seleccionar varias opciones.

*Check all that apply.*

- ☐ Plata local en apósito
- ☐ Plata local en pomada
- ☐ Antibiótico tópico
- ☐ Antibiótico sistémico
- ☐ Povidona iodada tópica
- ☐ Cadexómero iodado
- ☐ Otros

32. PERIODICIDAD ¿Cada cuántos días se cura la lesión? \*

---

## 33. Tipo de CURA \*

*Mark only one oval.*

- ☐ Seca
- ☐ Cura en ambiente húmedo
- ☐ Terapia de presión negativa
- ☐ Otros
- ☐ No sabe

## 34. Si contestó "OTROS" en relación al Tipo de cura, especificar:

---

---

---

---

---

## 35. Tipo de APÓSITO: \*

Seleccione el/los tipo(s) de apósito(s) utilizados.

*Check all that apply.*

- ☐ Gasa
- ☐ Alginato
- ☐ Hidrofibra de hidrocoloide sin plata
- ☐ Hidrofibra de hidrocoloide con plata
- ☐ Hidrocoloide
- ☐ Hidrogel
- ☐ Hidrocelular/espuma
- ☐ Malla de silicona
- ☐ Terapia de presión negativa
- ☐ Terapia larval
- ☐ Otros

36. Si contexto "OTROS" en relación al Tipo de apósito, especificar:

---

---

---

---

---

37. ¿El paciente presenta OTRAS LESIONES, además de la anteriormente descrita? \*

*Mark only one oval.*

☐ Sí

☐ No      *Skip to section 10 (Ha llegado al final, pulse enviar)*

## Lesión 2

Los datos de la siguiente sección deben referirse exclusivamente a la "Lesión 2"

38. Lesión. TIPO: \*

*Mark only one oval.*

☐ Pie diabético

☐ Úlcera arterial (las lesiones de etiología supuestamente isquémica, localizadas en el pie de pacientes diabéticos considérelas como "pie diabético")

☐ Úlcera venosa

☐ Úlcera por presión

☐ Úlcera traumática (incluye la laceración cutánea o skin tear)

☐ Lesión quirúrgica cronificada (dehiscencia de sutura con cicatrización por 2ª intención)

☐ Otras

39. Si contestó PIE DIABÉTICO, ¿qué CAUSA cree que es la que predomina?

*Mark only one oval.*

- ☐ Neuropatía
- ☐ Vasculopatía
- ☐ Infección
- ☐ Mixta
- ☐ No sabe

40. LOCALIZACIÓN de la lesión \*

*Mark only one oval.*

- ☐ Sacro/coxis
- ☐ Trocánter
- ☐ Isquion
- ☐ Glúteo
- ☐ Pierna (excepto pie)
- ☐ Pie
- ☐ Espalda
- ☐ Tórax
- ☐ Abdomen
- ☐ Brazos (excepto mano)
- ☐ Manos
- ☐ Cabeza
- ☐ Cuello
- ☐ Zona genital/perineal
- ☐ Otras

**41. PROFUNDIDAD de la lesión (aplicable solamente a úlceras por presión)**

Conteste solamente si contestó "Úlcera por presión" en la pregunta "TIPO de lesión".

*Mark only one oval.*

- ☐ Categoría I. Eritema no blanqueante
- ☐ Categoría II. Espesor parcial
- ☐ Categoría III. Pérdida total del espesor de la piel
- ☐ Categoría IV. Hueso, tendón o músculo expuestos
- ☐ No estadiable (por ejemplo, escara seca en talón)
- ☐ No sabe

**42. PROFUNDIDAD de la lesión según escala Wagner (aplicable solamente a pie diabético)**

Conteste solamente si contestó "Pie diabético" en la pregunta "TIPO de lesión".

*Mark only one oval.*

- ☐ Grado I. Úlcera superficial que afecta todo el espesor de la piel pero no afecta planos profundos
- ☐ Grado II. Úlcera profunda, afecta ligamentos o músculo, pero no al hueso ni hay abscesos
- ☐ Grado III. Úlcera profunda, con celulitis o absceso, a menudo con osteomielitis
- ☐ Grado IV. Gangrena localizada
- ☐ Grado V. Gangrena extensa que involucra la mayor parte del pie
- ☐ No sabe

43. PROFUNDIDAD de la lesión según escala CONUEI 2018 (aplicable al resto de lesiones)

Conteste en relación a aquella lesión que no sea úlcera por presión o pie diabético.

*Mark only one oval.*

- ☐ Grado I: úlcera que afecta a la epidermis y dermis
- ☐ Grado II: úlcera que afecta al tejido celular subcutáneo o hipodermis
- ☐ Grado III: úlcera que afecta a la fascia y al músculo
- ☐ Grado IV: úlcera que afecta al hueso
- ☐ No sabe

44. Área de la lesión. LARGO (cm) \*

Especificar con un decimal. Por ejemplo: 2,3

---

45. Área de la lesión. ANCHO (cm) \*

Especificar con un decimal. Por ejemplo: 2,1

---

46. ¿Úlcera RECURRENTE? \*

*Mark only one oval.*

- ☐ Sí
- ☐ No
- ☐ No sabe

47. ¿Se considera ahora INFECTADA? \*

*Mark only one oval.*

- ☐ Sí, signos clásicos: dolor, calor, rubor, secreción purulenta
- ☐ Sí, signos atípicos: tejido friable, decoloración, hipergranulación, biofilm, aumento del exudado
- ☐ No
- ☐ No sabe

48. TIEMPO de evolución (días) \*

---

49. Si sospecha infección, TRATAMIENTO actual de dicha infección:

Puede seleccionar varias opciones.

*Check all that apply.*

- ☐ Plata local en apósito
- ☐ Plata local en pomada
- ☐ Antibiótico tópico
- ☐ Antibiótico sistémico
- ☐ Povidona iodada tópica
- ☐ Cadexómero iodado
- ☐ Otros

50. PERIODICIDAD ¿Cada cuántos días se cura la lesión? \*

---



## 51. Tipo de CURA \*

*Mark only one oval.*

- ☐ Seca
- ☐ Cura en ambiente húmedo
- ☐ Terapia de presión negativa
- ☐ Otros
- ☐ No sabe

## 52. Si contestó "OTROS" en relación al Tipo de cura, especificar:

---

---

---

---

---

## 53. Tipo de APÓSITO: \*

Seleccione el/los tipo(s) de apósito(s) utilizados.

*Check all that apply.*

- ☐ Gasa
- ☐ Alginato
- ☐ Hidrofibra de hidrocoloide sin plata
- ☐ Hidrofibra de hidrocoloide con plata
- ☐ Hidrocoloide
- ☐ Hidrogel
- ☐ Hidrocelular/espuma
- ☐ Malla de silicona
- ☐ Terapia de presión negativa
- ☐ Terapia larval
- ☐ Otros

54. Si contexto "OTROS" en relación al Tipo de apósito, especificar:

---

---

---

---

---

55. ¿El paciente presenta OTRAS LESIONES, además de la anteriormente descrita? \*

*Mark only one oval.*

☐ Sí

☐ No      *Skip to section 10 (Ha llegado al final, pulse enviar)*

### Lesión 3

Los datos de la siguiente sección deben referirse exclusivamente a la "Lesión 3"

56. Lesión. TIPO: \*

*Mark only one oval.*

☐ Pie diabético

☐ Úlcera arterial (las lesiones de etiología supuestamente isquémica, localizadas en el pie de pacientes diabéticos considérelas como "pie diabético")

☐ Úlcera venosa

☐ Úlcera por presión

☐ Úlcera traumática (incluye la laceración cutánea o skin tear)

☐ Lesión quirúrgica cronificada (dehiscencia de sutura con cicatrización por 2ª intención)

☐ Otras

57. Si contestó PIE DIABÉTICO, ¿qué CAUSA cree que es la que predomina?

*Mark only one oval.*

- ☐ Neuropatía
- ☐ Vasculopatía
- ☐ Infección
- ☐ Mixta
- ☐ No sabe

58. LOCALIZACIÓN de la lesión \*

*Mark only one oval.*

- ☐ Sacro/coxis
- ☐ Trocánter
- ☐ Isquion
- ☐ Glúteo
- ☐ Pierna (excepto pie)
- ☐ Pie
- ☐ Espalda
- ☐ Tórax
- ☐ Abdomen
- ☐ Brazos (excepto mano)
- ☐ Manos
- ☐ Cabeza
- ☐ Cuello
- ☐ Zona genital/perineal
- ☐ Otras

**59. PROFUNDIDAD de la lesión (aplicable solamente a úlceras por presión)**

Conteste solamente si contestó "Úlcera por presión" en la pregunta "TIPO de lesión".

*Mark only one oval.*

- ☐ Categoría I. Eritema no blanqueante
- ☐ Categoría II. Espesor parcial
- ☐ Categoría III. Pérdida total del espesor de la piel
- ☐ Categoría IV. Hueso, tendón o músculo expuestos
- ☐ No estadiable (por ejemplo, escara seca en talón)
- ☐ No sabe

**60. PROFUNDIDAD de la lesión según escala Wagner (aplicable solamente a pie diabético)**

Conteste solamente si contestó "Pie diabético" en la pregunta "TIPO de lesión".

*Mark only one oval.*

- ☐ Grado I. Úlcera superficial que afecta todo el espesor de la piel pero no afecta planos profundos
- ☐ Grado II. Úlcera profunda, afecta ligamentos o músculo, pero no al hueso ni hay abscesos
- ☐ Grado III. Úlcera profunda, con celulitis o absceso, a menudo con osteomielitis
- ☐ Grado IV. Gangrena localizada
- ☐ Grado V. Gangrena extensa que involucra la mayor parte del pie
- ☐ No sabe

61. PROFUNDIDAD de la lesión según escala CONUEI 2018 (aplicable al resto de lesiones)

Conteste en relación a aquella lesión que no sea úlcera por presión o pie diabético.

*Mark only one oval.*

- ☐ Grado I: úlcera que afecta a la epidermis y dermis
- ☐ Grado II: úlcera que afecta al tejido celular subcutáneo o hipodermis
- ☐ Grado III: úlcera que afecta a la fascia y al músculo
- ☐ Grado IV: úlcera que afecta al hueso
- ☐ No sabe

62. Área de la lesión. LARGO (cm) \*

Especificar con un decimal. Por ejemplo: 2,3

---

63. Área de la lesión. ANCHO (cm) \*

Especificar con un decimal. Por ejemplo: 2,1

---

64. ¿Úlcera RECURRENTE? \*

*Mark only one oval.*

- ☐ Sí
- ☐ No
- ☐ No sabe

65. ¿Se considera ahora INFECTADA? \*

*Mark only one oval.*

- ☐ Sí, signos clásicos: dolor, calor, rubor, secreción purulenta
- ☐ Sí, signos atípicos: tejido friable, decoloración, hipergranulación, biofilm, aumento del exudado
- ☐ No
- ☐ No sabe

66. TIEMPO de evolución (días) \*

---

67. Si sospecha infección, TRATAMIENTO actual de dicha infección:

Puede seleccionar varias opciones.

*Check all that apply.*

- ☐ Plata local en apósito
- ☐ Plata local en pomada
- ☐ Antibiótico tópico
- ☐ Antibiótico sistémico
- ☐ Povidona iodada tópica
- ☐ Cadexómero iodado
- ☐ Otros

68. PERIODICIDAD ¿Cada cuántos días se cura la lesión? \*

---

## 69. Tipo de CURA \*

*Mark only one oval.*

- ☐ Seca
- ☐ Cura en ambiente húmedo
- ☐ Terapia de presión negativa
- ☐ Otros
- ☐ No sabe

## 70. Si contestó "OTROS" en relación al Tipo de cura, especificar:

---

---

---

---

---

## 71. Tipo de APÓSITO: \*

Seleccione el/los tipo(s) de apósito(s) utilizados.

*Check all that apply.*

- ☐ Gasa
- ☐ Alginato
- ☐ Hidrofibra de hidrocoloide sin plata
- ☐ Hidrofibra de hidrocoloide con plata
- ☐ Hidrocoloide
- ☐ Hidrogel
- ☐ Hidrocelular/espuma
- ☐ Malla de silicona
- ☐ Terapia de presión negativa
- ☐ Terapia larval
- ☐ Otros

72. Si contexto "OTROS" en relación al Tipo de apósito, especificar:

---

---

---

---

---

73. ¿El paciente presenta OTRAS LESIONES, además de la anteriormente descrita? \*

*Mark only one oval.*

☐ Sí

☐ No      *Skip to section 10 (Ha llegado al final, pulse enviar)*

#### Lesión 4

Los datos de la siguiente sección deben referirse exclusivamente a la "Lesión 4"

74. Lesión. TIPO: \*

*Mark only one oval.*

☐ Pie diabético

☐ Úlcera arterial (las lesiones de etiología supuestamente isquémica, localizadas en el pie de pacientes diabéticos considérelas como "pie diabético")

☐ Úlcera venosa

☐ Úlcera por presión

☐ Úlcera traumática (incluye la laceración cutánea o skin tear)

☐ Lesión quirúrgica cronificada (dehiscencia de sutura con cicatrización por 2ª intención)

☐ Otras



75. Si contestó PIE DIABÉTICO, ¿qué CAUSA cree que es la que predomina?

*Mark only one oval.*

- ☐ Neuropatía
- ☐ Vasculopatía
- ☐ Infección
- ☐ Mixta
- ☐ No sabe

76. LOCALIZACIÓN de la lesión \*

*Mark only one oval.*

- ☐ Sacro/coxis
- ☐ Trocánter
- ☐ Isquion
- ☐ Glúteo
- ☐ Pierna (excepto pie)
- ☐ Pie
- ☐ Espalda
- ☐ Tórax
- ☐ Abdomen
- ☐ Brazos (excepto mano)
- ☐ Manos
- ☐ Cabeza
- ☐ Cuello
- ☐ Zona genital/perineal
- ☐ Otras

**77. PROFUNDIDAD de la lesión (aplicable solamente a úlceras por presión)**

Conteste solamente si contestó "Úlcera por presión" en la pregunta "TIPO de lesión".

*Mark only one oval.*

- ☐ Categoría I. Eritema no blanqueante
- ☐ Categoría II. Espesor parcial
- ☐ Categoría III. Pérdida total del espesor de la piel
- ☐ Categoría IV. Hueso, tendón o músculo expuestos
- ☐ No estadiable (por ejemplo, escara seca en talón)
- ☐ No sabe

**78. PROFUNDIDAD de la lesión según escala Wagner (aplicable solamente a pie diabético)**

Conteste solamente si contestó "Pie diabético" en la pregunta "TIPO de lesión".

*Mark only one oval.*

- ☐ Grado I. Úlcera superficial que afecta todo el espesor de la piel pero no afecta planos profundos
- ☐ Grado II. Úlcera profunda, afecta ligamentos o músculo, pero no al hueso ni hay abscesos
- ☐ Grado III. Úlcera profunda, con celulitis o absceso, a menudo con osteomielitis
- ☐ Grado IV. Gangrena localizada
- ☐ Grado V. Gangrena extensa que involucra la mayor parte del pie
- ☐ No sabe

79. PROFUNDIDAD de la lesión según escala CONUEI 2018 (aplicable al resto de lesiones)

Conteste en relación a aquella lesión que no sea úlcera por presión o pie diabético.

*Mark only one oval.*

- ☐ Grado I: úlcera que afecta a la epidermis y dermis
- ☐ Grado II: úlcera que afecta al tejido celular subcutáneo o hipodermis
- ☐ Grado III: úlcera que afecta a la fascia y al músculo
- ☐ Grado IV: úlcera que afecta al hueso
- ☐ No sabe

80. Área de la lesión. LARGO (cm) \*

Especificar con un decimal. Por ejemplo: 2,3

---

81. Área de la lesión. ANCHO (cm) \*

Especificar con un decimal. Por ejemplo: 2,1

---

82. ¿Úlcera RECURRENTE? \*

*Mark only one oval.*

- ☐ Sí
- ☐ No
- ☐ No sabe

83. ¿Se considera ahora INFECTADA? \*

*Mark only one oval.*

- ☐ Sí, signos clásicos: dolor, calor, rubor, secreción purulenta
- ☐ Sí, signos atípicos: tejido friable, decoloración, hipergranulación, biofilm, aumento del exudado
- ☐ No
- ☐ No sabe

84. TIEMPO de evolución (días) \*

---

85. Si sospecha infección, TRATAMIENTO actual de dicha infección:

Puede seleccionar varias opciones.

*Check all that apply.*

- ☐ Plata local en apósito
- ☐ Plata local en pomada
- ☐ Antibiótico tópico
- ☐ Antibiótico sistémico
- ☐ Povidona iodada tópica
- ☐ Cadexómero iodado
- ☐ Otros

86. PERIODICIDAD ¿Cada cuántos días se cura la lesión? \*

---

## 87. Tipo de CURA \*

*Mark only one oval.*

- ☐ Seca
- ☐ Cura en ambiente húmedo
- ☐ Terapia de presión negativa
- ☐ Otros
- ☐ No sabe

## 88. Si contestó "OTROS" en relación al Tipo de cura, especificar:

---

---

---

---

---

## 89. Tipo de APÓSITO: \*

Seleccione el/los tipo(s) de apósito(s) utilizados.

*Check all that apply.*

- ☐ Gasa
- ☐ Alginato
- ☐ Hidrofibra de hidrocoloide sin plata
- ☐ Hidrofibra de hidrocoloide con plata
- ☐ Hidrocoloide
- ☐ Hidrogel
- ☐ Hidrocelular/espuma
- ☐ Malla de silicona
- ☐ Terapia de presión negativa
- ☐ Terapia larval
- ☐ Otros

90. Si contexto "OTROS" en relación al Tipo de apósito, especificar:

---

---

---

---

---

91. ¿El paciente presenta OTRAS LESIONES, además de la anteriormente descrita? \*

*Mark only one oval.*

☐ Sí

☐ No      *Skip to section 10 (Ha llegado al final, pulse enviar)*

#### Lesión 5

Los datos de la siguiente sección deben referirse exclusivamente a la "Lesión 5"

92. Lesión. TIPO: \*

*Mark only one oval.*

☐ Pie diabético

☐ Úlcera arterial (las lesiones de etiología supuestamente isquémica, localizadas en el pie de pacientes diabéticos considérelas como "pie diabético")

☐ Úlcera venosa

☐ Úlcera por presión

☐ Úlcera traumática (incluye la laceración cutánea o skin tear)

☐ Lesión quirúrgica cronificada (dehiscencia de sutura con cicatrización por 2ª intención)

☐ Otras

93. Si contestó PIE DIABÉTICO, ¿qué CAUSA cree que es la que predomina?

*Mark only one oval.*

- ☐ Neuropatía
- ☐ Vasculopatía
- ☐ Infección
- ☐ Mixta
- ☐ No sabe

94. LOCALIZACIÓN de la lesión \*

*Mark only one oval.*

- ☐ Sacro/coxis
- ☐ Trocánter
- ☐ Isquion
- ☐ Glúteo
- ☐ Pierna (excepto pie)
- ☐ Pie
- ☐ Espalda
- ☐ Tórax
- ☐ Abdomen
- ☐ Brazos (excepto mano)
- ☐ Manos
- ☐ Cabeza
- ☐ Cuello
- ☐ Zona genital/perineal
- ☐ Otras

**95. PROFUNDIDAD de la lesión (aplicable solamente a úlceras por presión)**

Conteste solamente si contestó "Úlcera por presión" en la pregunta "TIPO de lesión".

*Mark only one oval.*

- ☐ Categoría I. Eritema no blanqueante
- ☐ Categoría II. Espesor parcial
- ☐ Categoría III. Pérdida total del espesor de la piel
- ☐ Categoría IV. Hueso, tendón o músculo expuestos
- ☐ No estadiable (por ejemplo, escara seca en talón)
- ☐ No sabe

**96. PROFUNDIDAD de la lesión según escala Wagner (aplicable solamente a pie diabético)**

Conteste solamente si contestó "Pie diabético" en la pregunta "TIPO de lesión".

*Mark only one oval.*

- ☐ Grado I. Úlcera superficial que afecta todo el espesor de la piel pero no afecta planos profundos
- ☐ Grado II. Úlcera profunda, afecta ligamentos o músculo, pero no al hueso ni hay abscesos
- ☐ Grado III. Úlcera profunda, con celulitis o absceso, a menudo con osteomielitis
- ☐ Grado IV. Gangrena localizada
- ☐ Grado V. Gangrena extensa que involucra la mayor parte del pie
- ☐ No sabe



97. PROFUNDIDAD de la lesión según escala CONUEI 2018 (aplicable al resto de lesiones)

Conteste en relación a aquella lesión que no sea úlcera por presión o pie diabético.

*Mark only one oval.*

- ☐ Grado I: úlcera que afecta a la epidermis y dermis
- ☐ Grado II: úlcera que afecta al tejido celular subcutáneo o hipodermis
- ☐ Grado III: úlcera que afecta a la fascia y al músculo
- ☐ Grado IV: úlcera que afecta al hueso
- ☐ No sabe

98. Área de la lesión. LARGO (cm) \*

Especificar con un decimal. Por ejemplo: 2,3

---

99. Área de la lesión. ANCHO (cm) \*

Especificar con un decimal. Por ejemplo: 2,1

---

100. ¿Úlcera RECURRENTE? \*

*Mark only one oval.*

- ☐ Sí
- ☐ No
- ☐ No sabe

101. ¿Se considera ahora INFECTADA? \*

*Mark only one oval.*

- ☐ Sí, signos clásicos: dolor, calor, rubor, secreción purulenta
- ☐ Sí, signos atípicos: tejido friable, decoloración, hipergranulación, biofilm, aumento del exudado
- ☐ No
- ☐ No sabe

102. TIEMPO de evolución (días) \*

---

103. Si sospecha infección, TRATAMIENTO actual de dicha infección:

Puede seleccionar varias opciones.

*Check all that apply.*

- ☐ Plata local en apósito
- ☐ Plata local en pomada
- ☐ Antibiótico tópico
- ☐ Antibiótico sistémico
- ☐ Povidona iodada tópica
- ☐ Cadexómero iodado
- ☐ Otros

104. PERIODICIDAD ¿Cada cuántos días se cura la lesión? \*

---

## 105. Tipo de CURA \*

*Mark only one oval.*

- ☐ Seca
- ☐ Cura en ambiente húmedo
- ☐ Terapia de presión negativa
- ☐ Otros
- ☐ No sabe

## 106. Si contestó "OTROS" en relación al Tipo de cura, especificar:

---

---

---

---

---

## 107. Tipo de APÓSITO: \*

Seleccione el/los tipo(s) de apósito(s) utilizados.

*Check all that apply.*

- ☐ Gasa
- ☐ Alginato
- ☐ Hidrofibra de hidrocoloide sin plata
- ☐ Hidrofibra de hidrocoloide con plata
- ☐ Hidrocoloide
- ☐ Hidrogel
- ☐ Hidrocelular/espuma
- ☐ Malla de silicona
- ☐ Terapia de presión negativa
- ☐ Terapia larval
- ☐ Otros

108. Si contexto "OTROS" en relación al Tipo de apósito, especificar:

Ha llegado al  
final, pulse  
enviar

IMPORTANTE: si tiene más pacientes con lesiones crónicas, deberá rellenar  
tantas encuestas como pacientes lesionados

This content is neither created nor endorsed by Google.

Google Forms
