# Supplementary material
Source: Elsevier journal article supplement (https://www.sciencedirect.com/science/article/pii/S2445147921000515)
Supplement: mmc2 [file S2445147921000515:mmc2.pdf]

**Material suplementario 2, Check-list CHERRIES.** Elementos a valorar en encuestas *online* y recomendación para publicaciones que incluyan este tipo de cuestionarios.

|                                  |                                                         |                                                                                                                                                                                                                                                     |                                                                                                                                                                                                                                                                                                                                                                                                                                                                                                                                                                                                               |
|----------------------------------|---------------------------------------------------------|-----------------------------------------------------------------------------------------------------------------------------------------------------------------------------------------------------------------------------------------------------|---------------------------------------------------------------------------------------------------------------------------------------------------------------------------------------------------------------------------------------------------------------------------------------------------------------------------------------------------------------------------------------------------------------------------------------------------------------------------------------------------------------------------------------------------------------------------------------------------------------|
| <b>Diseño</b>                    | Describa el diseño de la encuesta                       | Describa la población objeto de estudio, el marco muestral. ¿Es la muestra una muestra por conveniencia?                                                                                                                                            | <p><b>Población objeto del estudio:</b> pacientes pertenecientes a los Centros de Salud de la Gerencia de Atención Integrada (GAI) de Cuenca con diagnóstico de úlcera de extremidad inferior. Población objeto: 135.107 habitantes.</p> <p><b>Marco muestral:</b> se intentó estudiar a la totalidad de la población, no existiendo por tanto muestreo. Población estudiada real: 131.190 habitantes (población adscrita al total de enfermeros que sí contestaron a la encuesta). Dicha población fue estudiada a través de un cuestionario enviado a los enfermeros de referencia de dichos pacientes.</p> |
| <b>Aspectos éticos y legales</b> | Aprobación CEIC (Comité Ético de Investigación Clínica) | Mencione si el estudio ha sido aprobado por un Comité de Ética.                                                                                                                                                                                     | Aprobado por la Comisión de Investigación del Área de Salud de Cuenca (fecha 02/Abril/2019 con el código 03032019) y del Comité de Ética de la GAI de Cuenca (código 2019/PI0319).                                                                                                                                                                                                                                                                                                                                                                                                                            |
|                                  | Consentimiento informado                                | Consentimiento informado. Describa el proceso de consentimiento informado. ¿Cómo se les informó sobre la duración de la encuesta, sobre qué datos se almacenarían y por cuanto tiempo y sobre quiénes son los promotores y el objetivo del estudio? | La contestación de la encuesta por los profesionales era voluntaria, luego el consentimiento era implícito. Los pacientes estudiados recibieron una hoja informativa de consentimiento informado, otorgando el consentimiento de forma oral o escrita. Puesto que este trabajo analiza pacientes que están recibiendo cuidados en el momento de estudio, no son necesarios accesos suplementarios a la historia clínica más allá de los necesarios en la práctica habitual.                                                                                                                                   |
|                                  | Protección de datos                                     | Describa los mecanismos que se usaron para proteger accesos no autorizados en el caso de que se almacenase algún dato personal.                                                                                                                     | El acceso a la encuesta solo era posible para aquellos enfermeros de la GAI de Cuenca que habían recibido un enlace. Se creó una base de datos pseudonimizada en la que cada profesional que contestaba la encuesta asignaba un código a cada uno de los pacientes que incluía, permitiendo de esa forma su localización posterior en caso de ser necesario. Solo el autor principal del proyecto tenía acceso a dicha base de datos.                                                                                                                                                                         |

|                                                                                            |                                      |                                                                                                                                                                                                                                                                                                                |                                                                                                                                                                                                                                                                                                                                                                                                                                                                                                                                                                                                                                                                                                                                                                     |
|--------------------------------------------------------------------------------------------|--------------------------------------|----------------------------------------------------------------------------------------------------------------------------------------------------------------------------------------------------------------------------------------------------------------------------------------------------------------|---------------------------------------------------------------------------------------------------------------------------------------------------------------------------------------------------------------------------------------------------------------------------------------------------------------------------------------------------------------------------------------------------------------------------------------------------------------------------------------------------------------------------------------------------------------------------------------------------------------------------------------------------------------------------------------------------------------------------------------------------------------------|
| <b>Desarrollo y Pretest</b>                                                                | Desarrollo y pilotaje                | <p>Describe como se desarrolló la encuesta, incluyendo información sobre si se ha testado la usabilidad y la funcionalidad previa a su difusión.</p>                                                                                                                                                           | <p>En el diseño del cuestionario se tuvieron en cuenta: 1) información que fue considerada relevante en los estudios previos de prevalencia del GNEAUPP y otros estudios internacionales, 2) consecución de una adecuada relación entre cantidad de información-rapidez de respuesta y 3) adecuar el cuestionario a las limitaciones impuestas por la plataforma elegida debido a su carácter de acceso libre y gratuito (Google Forms).</p> <p>La encuesta fue presentada a la GAI de Cuenca de forma presencial incluyendo después las sugerencias de mejora aportadas por los profesionales de la GAI (médicos y enfermeros).</p> <p>Una encuesta piloto fue enviada a un grupo de 10 profesionales enfermeros para valorar su usabilidad y depurar errores.</p> |
| <b>Proceso de reclutamiento y descripción de la muestra que tiene acceso a la encuesta</b> | Encuesta abierta vs encuesta cerrada | <p>Una “encuesta abierta” es una encuesta disponible para cualquier visitante del sitio web frente a la “encuesta cerrada”, donde sólo está disponible para la muestra que el investigador decida (protegida por contraseña).</p>                                                                              | <p>Encuesta cerrada protegida con acceso mediante enlace enviado a los correos corporativos.</p>                                                                                                                                                                                                                                                                                                                                                                                                                                                                                                                                                                                                                                                                    |
|                                                                                            | Modo de contacto                     | <p>Indicar si se ha producido o no contacto inicial con los potenciales participantes a través de internet u otro medio.</p>                                                                                                                                                                                   | <p>Contacto con los profesionales enfermeros a través de correo corporativo.</p>                                                                                                                                                                                                                                                                                                                                                                                                                                                                                                                                                                                                                                                                                    |
|                                                                                            | Publicidad de la encuesta            | <p>¿Cómo se ha publicitado la encuesta? Ejemplos: prensa escrita (periódicos, revistas) o virtual (listas de correos --- Si es así, consigne cuales), o anuncios tipo banner (indicar donde se colocaron y su aspecto). Es importante describir el lenguaje usado en los anuncios pues podría influenciar.</p> | <p>Antes de lanzar la encuesta, el investigador principal realizó: 1) una sesión presencial informativa a los Responsables de Enfermería de cada Centro de Salud, y 2) una teleconferencia a la que tenían acceso todos los profesionales sanitarios de los Centros implicados. En ellas, se presentó el proyecto, se visualizó el cuestionario punto por punto, se recogieron sugerencias de mejora y se resolvieron dudas. Además, en los 15 días previos al lanzamiento de la encuesta, se enviaron tres correos cortos (días -15, -7, -1) recordando la inminente fecha de apertura de la encuesta.</p>                                                                                                                                                         |

|                                      |                              |                                                                                                                                                                                                                                                                                                                                                                                                                                                                                             |                                                                                                                                                                                                                                             |
|--------------------------------------|------------------------------|---------------------------------------------------------------------------------------------------------------------------------------------------------------------------------------------------------------------------------------------------------------------------------------------------------------------------------------------------------------------------------------------------------------------------------------------------------------------------------------------|---------------------------------------------------------------------------------------------------------------------------------------------------------------------------------------------------------------------------------------------|
|                                      |                              | Posteriormente, se enviaron hasta tres correos recordatorios a aquellos profesionales que tras dos semanas no habían contestado la encuesta.                                                                                                                                                                                                                                                                                                                                                |                                                                                                                                                                                                                                             |
| <b>Administración de la encuesta</b> | Web/E-mail                   | Describe el tipo de e-encuesta utilizado (encuesta en sitio web o enviada por email). Si es tipo email, describa si las respuestas se introducían manualmente en una base de datos o existe un método de captura automático.                                                                                                                                                                                                                                                                | Encuesta realizada en la plataforma Google Forms, con enlace de entrada enviado por mail corporativo. Desde Google Forms, las respuestas se capturaban automáticamente en una base de datos Excel, para su posterior depuración y análisis. |
|                                      | Contexto                     | Describe el Sitio Web (en el caso de listas de correo / grupos de noticias) en el cual se publicó la encuesta. Describa sobre qué versaba el sitio web, quién lo visita y qué buscan normalmente los usuarios al acceder a este sitio. Discuta hasta qué punto el contenido de la web podría preseleccionar la muestra o influenciar los resultados. Por ejemplo, en una encuesta sobre vacunas esto podría modificarse si se tratase de una web perteneciente a la administración pública. | No aplica al ser enviada al correo corporativo.                                                                                                                                                                                             |
|                                      | Voluntariedad/Obligatoriedad | Puntualice si era obligatorio o no realizar la encuesta para acceder a la web, o era voluntaria.                                                                                                                                                                                                                                                                                                                                                                                            | Voluntaria.                                                                                                                                                                                                                                 |
|                                      | Incentivos                   | Enumere que tipos de incentivos se ofrecían para su cumplimentación (económicos, premios o descuentos).                                                                                                                                                                                                                                                                                                                                                                                     | Ninguno.                                                                                                                                                                                                                                    |
|                                      | Tiempo y fecha               | Describe el marco temporal en el que se llevó a cabo la recogida de datos.                                                                                                                                                                                                                                                                                                                                                                                                                  | Del 17 de febrero al 13 de marzo del 2020, pero al tratarse de un estudio de prevalencia puntual, las lesiones a registrar se referían exclusivamente a aquellas presentes a fecha 17 de febrero de 2020.                                   |

|                                 |                                                                                                                                                                                                                                    |                                                                                                                                                                                                                                                                                                                                                                                                                                                                                                                                                                                                                                                                                                                                                                             |
|---------------------------------|------------------------------------------------------------------------------------------------------------------------------------------------------------------------------------------------------------------------------------|-----------------------------------------------------------------------------------------------------------------------------------------------------------------------------------------------------------------------------------------------------------------------------------------------------------------------------------------------------------------------------------------------------------------------------------------------------------------------------------------------------------------------------------------------------------------------------------------------------------------------------------------------------------------------------------------------------------------------------------------------------------------------------|
| Aleatorización del cuestionario | Especifique si se aleatorizan o alternan los elementos de la encuesta para prevenir sesgos.                                                                                                                                        | No aleatorizado.                                                                                                                                                                                                                                                                                                                                                                                                                                                                                                                                                                                                                                                                                                                                                            |
| Adaptación en tiempo real       | Uso de cuestionarios adaptados (enumere si determinados ítems del cuestionario se muestran de forma condicional en función del resultados ya recogidos en secciones previas) para reducir la complejidad y el número de preguntas. | Adaptación parcial, con posibilidad de saltar secciones si no existían más lesiones a evaluar.                                                                                                                                                                                                                                                                                                                                                                                                                                                                                                                                                                                                                                                                              |
| Número de ítems                 | ¿Cuál es el número de ítems por página? Es un factor importante relacionado con la tasa de completado.                                                                                                                             | Ver Material suplementario 1, Cuestionario ad hoc plataforma Google Forms.<br>La encuesta aparece de forma continua, por lo que no se estructura en pantallas, sino en 10 secciones:<br><ol style="list-style-type: none"> <li>1. Presentación: 1 pregunta</li> <li>2. Datos del Centro de Salud: 1 pregunta</li> <li>3. Existencia de lesiones: 1 pregunta</li> <li>4. Datos del paciente: 16 preguntas</li> <li>5. Datos de Lesión 1: 18 preguntas</li> <li>6. Datos de Lesión 2: igual a Lesión 1</li> <li>7. Datos de Lesión 3: igual a Lesión 1</li> <li>8. Datos de Lesión 4: igual a Lesión 1</li> <li>9. Datos de Lesión 5: igual a Lesión 1</li> <li>10. Fin, agradecimiento</li> </ol> Es posible saltar desde el final de la sección 3, 5, 6, 7, 8 y 9 al final. |
| Número de pantallas o páginas   | ¿En cuántas páginas/pantallas se distribuyó el cuestionario? El número de páginas es un factor importante relacionado con la tasa de completado.                                                                                   | Ver cuadro superior.                                                                                                                                                                                                                                                                                                                                                                                                                                                                                                                                                                                                                                                                                                                                                        |
| Comprobación test completos     | ¿Es técnicamente posible verificar la consistencia y el cumplimentado de todos los campos antes de enviar la encuesta? Si esto fue realizado, describa como (JavaScript                                                            | Los ítems considerados como imprescindibles eran de cumplimentación obligatoria, no dejando avanzar en caso de no contestar.                                                                                                                                                                                                                                                                                                                                                                                                                                                                                                                                                                                                                                                |

|                   |                                                                                                                                  |                                                                                                                                                                                                                                                                                                                              |                                                                                                                                                                                                                                                                                                                                                   |
|-------------------|----------------------------------------------------------------------------------------------------------------------------------|------------------------------------------------------------------------------------------------------------------------------------------------------------------------------------------------------------------------------------------------------------------------------------------------------------------------------|---------------------------------------------------------------------------------------------------------------------------------------------------------------------------------------------------------------------------------------------------------------------------------------------------------------------------------------------------|
|                   |                                                                                                                                  | normalmente). Si la verificación se ha realizado después del momento del envío, especifíquelo. Todos los elementos de la encuesta deberían disponer de una opción de no-respuesta como “no aplica” o “prefiero no especificarlo” y la selección de respuesta única debería prevalecer sobre la opción de selección múltiple. | Los datos sospechosos de error fueron consultados con los profesionales vía correo corporativo. La mayoría de los elementos de la encuesta (excepto tamaño de la herida, tiempo de evolución de la herida y periodicidad de la cura) que podrían representar dificultad de respuesta disponen de opciones catalogadas como: “Otros”, y “No sabe”. |
|                   | Posibilidad de revisión                                                                                                          | Especifique si los Usuarios tenían la posibilidad de cambiar sus respuestas (por ejemplo usando un botón de volver atrás o de “revisión” o mostrando un resumen al final y preguntando sobre si está bien recogido o no).                                                                                                    | Los usuarios disponían de la opción de cambiar respuestas con un botón de volver atrás, además tenían la opción de enviar a su correo una copia con las respuestas de la encuesta.                                                                                                                                                                |
| Tasa de respuesta | Número de usuarios únicos                                                                                                        | Si ofrece número de visualizaciones o tasa de participación, defina como se decide cual es el usuario único o visitante único. Existen varias técnicas posibles basadas en dirección IP, cookies o ambos.                                                                                                                    | Cada usuario es reconocido a través de la dirección de correo corporativo asociada a la encuesta que remite.                                                                                                                                                                                                                                      |
|                   | Tasa de visualización (ratio de visualizaciones de la encuesta/número de usuarios únicos)                                        | Total de usuarios únicos que visitan la primera página de la encuesta, dividido por el número de usuarios únicos que visitan la web (esto es distinto del número de visualizaciones de la web). No es raro tener tasa de visualizaciones menores del 0,1% si la encuesta es voluntaria.                                      | No aplica ya que la encuesta no está ubicada dentro de una web, sino que se envía a través del correo corporativo.                                                                                                                                                                                                                                |
|                   | Tasa de participación (Ratio de usuarios únicos que aceptan participar/número de visitantes de la primera página de la encuesta) | Total de personas únicas que cumplieron la primera página de la encuesta (o aceptaron participar marcando en un <i>checkbox</i> ) dividido del número de usuarios que visitó la primera página de la encuesta. Este término con frecuencia se llama también <i>tasa de reclutamiento</i> .                                   | Desconocido, pero debido a que la tasa de participación final fue del 98,1% $((152/155) \times 100)$ , se asume que la tasa de reclutamiento mínima fue también del 98,1%.                                                                                                                                                                        |

|                                                              |                                                                                                                       |                                                                                                                                                                                                                                                                                                                                                                                                                                                                                                                                                                                    |                                                                                                                                                                                                                                                                                                                                                                                         |
|--------------------------------------------------------------|-----------------------------------------------------------------------------------------------------------------------|------------------------------------------------------------------------------------------------------------------------------------------------------------------------------------------------------------------------------------------------------------------------------------------------------------------------------------------------------------------------------------------------------------------------------------------------------------------------------------------------------------------------------------------------------------------------------------|-----------------------------------------------------------------------------------------------------------------------------------------------------------------------------------------------------------------------------------------------------------------------------------------------------------------------------------------------------------------------------------------|
|                                                              | Tasa de finalización (Ratio número de usuarios que finalizan la encuesta/número de usuarios que aceptaron participar) | Total de personas que enviaron la última página del cuestionario dividido sobre el total de aquellos que aceptaron participar. Esto es relevante si el consentimiento informado está en una página separada o la encuesta se desarrolla en diferentes páginas. Esta es una medida importante del nivel de abandono de la encuesta. Tenga en cuenta que “Completar el cuestionario” puede significar tener elementos del cuestionario en blanco. Esta no es una medida de como completo están los cuestionarios. Si necesita una medida para eso use la <i>tasa de completado</i> . | Desconocida, pero debido a que la tasa de participación final fue del 98,1%, se asume que la tasa de finalización mínima fue también del 98,1%.                                                                                                                                                                                                                                         |
| <b>Prevención de entradas repetidas por el mismo usuario</b> | Uso de <i>cookies</i>                                                                                                 | Indique si se utilizaron cookies para asignar identificadores únicos a los visitantes dentro de cada cliente en el ordenador. Si eso fue así, mencione la página en la que se establecía y se leía la cookie así como por cuanto tiempo permanece válida en el equipo del usuario.                                                                                                                                                                                                                                                                                                 | No se utilizaron cookies.                                                                                                                                                                                                                                                                                                                                                               |
|                                                              | Comprobación IP                                                                                                       | Indique si se realizaba comprobación por IP para detectar posibles entradas duplicadas del mismo usuario. Si esto es así, mencione el periodo de tiempo en el cuál no se permitía la reentrada desde la misma dirección IP (24 horas, 48 horas). Indique si se impide la duplicidad a partir de la IP antes de completar el cuestionario (tiempo real) o durante el depurado y previo al análisis. Si la duplicidad de IP se permite pero se elimina previa al análisis, indique que entrada es la que se quedaba para el análisis (la primera, la más reciente...)                | Se verificó de forma no automática si un paciente había sido incluido por error varias veces, comprobando que las claves de seudonimización de los pacientes no estaban repetidas. Por tanto, la duplicidad se evitaba en el periodo de depurado de los datos. No se detectaron duplicados que requirieran ponerse en contacto con los profesionales que habían contestado la encuesta. |

|          |                                                       |                                                                                                                                                                                                                                                                                                                                                                                                                                                   |                                                                                                                                                                                                                                                                          |
|----------|-------------------------------------------------------|---------------------------------------------------------------------------------------------------------------------------------------------------------------------------------------------------------------------------------------------------------------------------------------------------------------------------------------------------------------------------------------------------------------------------------------------------|--------------------------------------------------------------------------------------------------------------------------------------------------------------------------------------------------------------------------------------------------------------------------|
|          | Análisis del archivo .log                             | Señale que otras técnica utiliza (si hay) para analizar el archivo .log para la identificación de entradas múltiples.                                                                                                                                                                                                                                                                                                                             | Ninguna.                                                                                                                                                                                                                                                                 |
|          | Registro                                              | En cuestionarios “cerrados” el usuario tiene que registrarse y esto ayuda a prevenir las entradas duplicadas a partir del mismo usuario. Describa si utilizaba este método cómo se realizaba. Por ejemplo, “la encuesta nunca se volvía a mostrar si ya existía una completada”, o se almacenaban todas junto a un usuario que posteriormente se eliminaba. Si es la última opción, especifique cuál de las entradas se quedaba para el análisis. | Ver ítem “Comprobación de IP”.                                                                                                                                                                                                                                           |
| Análisis | Manejo de cuestionarios incompletos                   | Especifique si se analizaron todos los cuestionarios o solo los que estaban completos en su totalidad. Para usuarios que no avanzaron por todo el cuestionario y se terminaron precozmente, señale si se incluyeron también en el análisis.                                                                                                                                                                                                       | Los ítems relevantes debían estar completos para poder continuar. En la revisión de los datos, los datos supuestamente erróneos eran corregidos (consultando con el profesional que contestó la encuesta, si era necesario).                                             |
|          | Manejo de cuestionarios con marcas de tiempo atípicas | Algunos investigadores miden el tiempo que las personas necesitan para completar un cuestionario y excluyen cuestionarios que se enviaron en un período de tiempo muy corto. Si usa esta técnica, especifique el margen de tiempo para el punto de corte de cuales se aceptaban como válidos y como se determina ese punto de corte.                                                                                                              | No se ha utilizado esta técnica.                                                                                                                                                                                                                                         |
|          | Correcciones estadísticas                             | Señale si se han utilizado herramientas estadísticas para ajustar la no representatividad de la muestra (por ejemplo peso de ítems o <i>propensity scores</i> ). Señale cuáles.                                                                                                                                                                                                                                                                   | No se han aplicado dichas técnicas, pero se ha hecho un cálculo a posteriori de la precisión alcanzada con la herramienta estadística Epidat 3.0:<br>Considerando: 1) tamaño poblacional total de 135.107 sujetos, nivel de confianza del 99%, prevalencia esperada 0,2% |

---

(prevalencia media reportada en la CONUEI 2018 0,1-0,3%), la precisión obtenida a posteriori sería de 99,995%.
